# Supplementary material
Source: PubMed Central journal article supplement (PMC4575267)
Supplement: NIHMS704634-supplement-1.pdf [file NIHMS704634-supplement-1.pdf]

**Supplementary Information for**

**Human Calprotectin Is an Iron-Sequestering Host-Defense Protein**

Toshiki G. Nakashige<sup>1</sup>, Bo Zhang<sup>2</sup>, Carsten Krebs<sup>2,3</sup>, and Elizabeth M. Nolan<sup>1,\*</sup>

<sup>1</sup>Department of Chemistry, Massachusetts Institute of Technology, Cambridge, MA 02139, USA

<sup>2</sup>Department of Chemistry, Pennsylvania State University, University Park, PA 16802, USA

<sup>3</sup>Department of Biochemistry and Molecular Biology, Pennsylvania State University, University Park, PA 16802, USA

\*Corresponding author: [lnolan@mit.edu](mailto:lnolan@mit.edu)

Phone: (617) 452-2495

Fax: (617) 324-0505

## Supplementary Results

This Supplementary Information includes:

|                                                                                                                                                                     |     |
|---------------------------------------------------------------------------------------------------------------------------------------------------------------------|-----|
| <b>Supplementary Tables</b>                                                                                                                                         | S3  |
| <b>Supplementary Table 1.</b> Human calprotectin (CP) protein nomenclature.....                                                                                     | S3  |
| <b>Supplementary Tables 2-13.</b> Metal analysis of CP-treated medium.....                                                                                          | S4  |
| <b>Supplementary Table 14.</b> Fe(II) buffering conditions for ZP1 $K_{d,Fe(II)}$ determination....                                                                 | S16 |
| <b>Supplementary Figures</b>                                                                                                                                        | S17 |
| <b>Supplementary Figure 1.</b> Amino acid sequence alignment of human S100 proteins...                                                                              | S17 |
| <b>Supplementary Figure 2.</b> Metal analysis of CP-treated medium.....                                                                                             | S18 |
| <b>Supplementary Figure 3.</b> Western blot of CP-treated medium .....                                                                                              | S19 |
| <b>Supplementary Figure 4.</b> Metal-substitution growth assay protocol.....                                                                                        | S20 |
| <b>Supplementary Figure 5.</b> Metal-substitution growth assay in untreated medium.....                                                                             | S21 |
| <b>Supplementary Figure 6.</b> Antimicrobial activity assays against <i>L. plantarum</i> .....                                                                      | S22 |
| <b>Supplementary Figure 7.</b> Antimicrobial activity assay against <i>P. aeruginosa</i> .....                                                                      | S23 |
| <b>Supplementary Figure 8.</b> Antimicrobial activity assays against <i>E. coli</i> and <i>S. aureus</i><br>with BME or DTT.....                                    | S24 |
| <b>Supplementary Figures 9-11.</b> Analytical size-exclusion chromatography (SEC) of<br>CP.....                                                                     | S25 |
| <b>Supplementary Figure 12.</b> 4.2-K/53-mT Mössbauer spectra of $^{57}Fe(II)$ -bound CP-<br>Ser and $\Delta His_3 Asp$ .....                                       | S28 |
| <b>Supplementary Figure 13.</b> Temperature dependence of the Mössbauer spectra of<br>$^{57}Fe(II)$ -bound CP-Ser without an externally applied magnetic field..... | S29 |
| <b>Supplementary Figure 14.</b> Proposed Fe(II) coordination site of CP.....                                                                                        | S30 |
| <b>Supplementary Figure 15.</b> Optical absorption and emission spectroscopy of ZP1.....                                                                            | S31 |
| <b>Supplementary Figure 16.</b> ZP1 $K_{d,Fe(II)}$ determination.....                                                                                               | S32 |
| <b>Supplementary Figure 17.</b> ZP1 Fe(II) competition with native CP.....                                                                                          | S33 |
| <b>Supplementary Figure 18.</b> ZP1 Fe(II) competition with CP-Ser and BME.....                                                                                     | S34 |
| <b>Supplementary Figure 19.</b> ZP1 Fe(II) competition with CP-Ser and $FeCl_2$ .....                                                                               | S35 |
| <b>Supplementary Figure 20.</b> ZP1 Fe(II) competition titrations with CP.....                                                                                      | S36 |
| <b>Supplementary Figure 21.</b> Ferrozine Fe(II) competition with tail variants.....                                                                                | S37 |
| <b>Supplementary Figure 22.</b> ZP1 Fe(II) competition with human S100 proteins.....                                                                                | S38 |
| <b>Supplementary Figure 23.</b> Metal displacement with CP-Ser $\Delta His_3 Asp$ .....                                                                             | S39 |
| <b>Supplementary Note</b>                                                                                                                                           | S40 |
| <b>Supplementary References</b>                                                                                                                                     | S43 |

**Supplementary Table 1. Human Calprotectin Mutant Protein Nomenclature**

| Protein                              | S100A8 Mutation(s)           | S100A9 Mutation(s)          |
|--------------------------------------|------------------------------|-----------------------------|
| CP                                   | n/a                          | n/a                         |
| CP-Ser                               | C42S                         | C3S                         |
| CP-Ser $\Delta$ His <sub>3</sub> Asp | C42S, H83A, H87A             | C3S, H20A, D30A             |
| CP-Ser $\Delta$ His <sub>4</sub>     | C42S, H17A, H27A             | C3S, H91A, H95A             |
| CP-Ser $\Delta\Delta$                | C42S, H17A, H27A, H83A, H87A | C3S, H20A, D30A, H91A, H95A |
| CP-Ser(H103A)                        | C42S                         | C3S, H103A                  |
| CP-Ser(H104A)                        | C42S                         | C3S, H104A                  |
| CP-Ser(H105A)                        | C42S                         | C3S, H105A                  |
| CP-Ser-AHA                           | C42S                         | C3S, H103A, H105A           |
| CP-Ser-AAA                           | C42S                         | C3S, H103A, H104A, H105A    |

**Supplementary Table 2. Metal analysis of untreated medium (+BME)**

| -Ca(II) |     | Mg   | Ca    | Mn     | Fe    | Co     | Ni     | Cu     | Zn    |
|---------|-----|------|-------|--------|-------|--------|--------|--------|-------|
| 1       | ppm | 3.75 | 3.99  | 0.0126 | 0.192 | 0.0074 | 0.0188 | 0.0125 | 0.365 |
|         | μM  | 154  | 99.6  | 0.229  | 3.44  | 0.130  | 0.320  | 0.197  | 5.58  |
| 2       | ppm | 3.90 | 4.01  | 0.0065 | 0.167 | 0      | 0.0062 | 0.0095 | 0.341 |
|         | μM  | 160  | 100   | 0.118  | 2.99  | 0      | 0.106  | 0.149  | 5.22  |
| 3       | ppm | 3.68 | 3.78  | 0.009  | 0.172 | 0.006  | 0.013  | 0.018  | 0.338 |
|         | μM  | 151  | 94.3  | 0.164  | 3.080 | 0.105  | 0.222  | 0.283  | 5.17  |
| 4       | ppm | 3.69 | 3.92  | 0.006  | 0.201 | 0.002  | 0.010  | 0.007  | 0.384 |
|         | μM  | 152  | 97.8  | 0.109  | 3.60  | 0.035  | 0.170  | 0.110  | 5.87  |
| 5       | ppm | 3.52 | 4.46  | 0.010  | 0.210 | 0.004  | 0.018  | 0.013  | 0.394 |
|         | μM  | 145  | 111   | 0.180  | 3.76  | 0.067  | 0.310  | 0.203  | 6.03  |
| 6       | ppm | 3.54 | 3.62  | 0.011  | 0.122 | 0.0004 | 0.014  | 0.012  | 0.222 |
|         | μM  | 146  | 90.3  | 0.191  | 2.19  | 0.007  | 0.239  | 0.192  | 3.40  |
| 7       | ppm | 4.10 | 3.99  | 0.013  | 0.162 | 0      | 0.023  | 0.012  | 0.308 |
|         | μM  | 169  | 99.6  | 0.237  | 2.90  | 0      | 0.392  | 0.189  | 4.71  |
| +Ca(II) |     | Mg   | Ca    | Mn     | Fe    | Co     | Ni     | Cu     | Zn    |
| 1       | ppm | 3.78 | 81.14 | 0.0123 | 0.158 | 0.0076 | 0.018  | 0.0099 | 0.36  |
|         | μM  | 156  | 2020  | 0.224  | 2.83  | 0.133  | 0.307  | 0.156  | 5.51  |
| 2       | ppm | 3.99 | 77.7  | 0.0066 | 0.154 | 0      | 0.0066 | 0.0073 | 0.341 |
|         | μM  | 164  | 1940  | 0.120  | 2.76  | 0      | 0.112  | 0.115  | 5.215 |
| 3       | ppm | 3.66 | 73.9  | 0.009  | 0.173 | 0.008  | 0.012  | 0.016  | 0.343 |
|         | μM  | 151  | 1840  | 0.164  | 3.10  | 0.141  | 0.204  | 0.252  | 5.25  |
| 4       | ppm | 3.47 | 83.8  | 0.006  | 0.173 | 0.002  | 0.008  | 0.008  | 0.338 |
|         | μM  | 143  | 2090  | 0.109  | 3.10  | 0.035  | 0.136  | 0.126  | 5.17  |
| 5       | ppm | 3.54 | 77.4  | 0.010  | 0.196 | 0.004  | 0.015  | 0.011  | 0.360 |
|         | μM  | 146  | 1930  | 0.177  | 3.51  | 0.061  | 0.250  | 0.168  | 5.51  |
| 6       | ppm | 3.58 | 82.9  | 0.010  | 0.083 | 0.0004 | 0.012  | 0.009  | 0.212 |
|         | μM  | 147  | 2070  | 0.177  | 1.49  | 0.007  | 0.204  | 0.146  | 3.25  |
| 7       | ppm | 3.62 | 70.4  | 0.013  | 0.119 | 0      | 0.041  | 0.010  | 0.316 |
|         | μM  | 149  | 1760  | 0.237  | 2.12  | 0      | 0.702  | 0.164  | 4.84  |

**Supplementary Table 3. Metal analysis of medium (+BME) treated with 125 µg/mL CP-Ser**

|       |     | <b>-Ca(II)</b> |      |        |       |        |        |        |        |
|-------|-----|----------------|------|--------|-------|--------|--------|--------|--------|
| Trial |     | Mg             | Ca   | Mn     | Fe    | Co     | Ni     | Cu     | Zn     |
| 1     | ppm | 3.67           | 3.65 | 0.0086 | 0.17  | 0.0077 | 0.0184 | 0.011  | 0.0941 |
|       | µM  | 151            | 91.1 | 0.157  | 3.04  | 0.135  | 0.314  | 0.173  | 1.44   |
| 2     | ppm | 3.89           | 3.79 | 0.004  | 0.171 | 0      | 0.005  | 0.0101 | 0.133  |
|       | µM  | 160            | 94.6 | 0.073  | 3.062 | 0      | 0.085  | 0.159  | 2.034  |
| 3     | ppm | 3.60           | 3.17 | 0.001  | 0.080 | 0.006  | 0.007  | 0.015  | 0.006  |
|       | µM  | 148            | 79.1 | 0.018  | 1.43  | 0.105  | 0.119  | 0.236  | 0.092  |
| 4     | ppm | 3.66           | 3.35 | 0.006  | 0.170 | 0.002  | 0.006  | 0.007  | 0.099  |
|       | µM  | 151            | 83.6 | 0.109  | 3.04  | 0.035  | 0.102  | 0.110  | 1.514  |
|       |     | <b>+Ca(II)</b> |      |        |       |        |        |        |        |
| Trial |     | Mg             | Ca   | Mn     | Fe    | Co     | Ni     | Cu     | Zn     |
| 1     | ppm | 3.77           | 80.6 | 0.005  | 0.124 | 0.0071 | 0.0182 | 0.0097 | 0.0233 |
|       | µM  | 155            | 2010 | 0.091  | 2.23  | 0.125  | 0.310  | 0.153  | 0.356  |
| 2     | ppm | 3.97           | 76.2 | 0      | 0.148 | 0      | 0.0054 | 0.0079 | 0.0183 |
|       | µM  | 163            | 1900 | 0      | 2.65  | 0      | 0.092  | 0.124  | 0.280  |
| 3     | ppm | 3.51           | 71.0 | 0.001  | 0.083 | 0.006  | 0.0005 | 0.014  | 0.005  |
|       | µM  | 144            | 1770 | 0.018  | 1.49  | 0.105  | 0.009  | 0.220  | 0.076  |
| 4     | ppm | 3.45           | 83.3 | 0.005  | 0.097 | 0      | 0.007  | 0.008  | 0.005  |
|       | µM  | 142            | 2080 | 0.091  | 1.74  | 0      | 0.119  | 0.126  | 0.076  |

**Supplementary Table 4. Metal analysis of medium (+BME) treated with 250 µg/mL CP-Ser**

|       |     | <b>-Ca(II)</b> |      |        |        |        |        |        |        |
|-------|-----|----------------|------|--------|--------|--------|--------|--------|--------|
| Trial |     | Mg             | Ca   | Mn     | Fe     | Co     | Ni     | Cu     | Zn     |
| 1     | ppm | 3.64           | 3.18 | 0.0045 | 0.0207 | 0.008  | 0.0125 | 0.0089 | 0.0159 |
|       | µM  | 150            | 79.3 | 0.082  | 0.371  | 0.141  | 0.213  | 0.140  | 0.243  |
| 2     | ppm | 3.82           | 3.11 | 0      | 0.0011 | 0      | 0      | 0.0027 | 0.0018 |
|       | µM  | 157            | 77.6 | 0      | 0.020  | 0      | 0      | 0.042  | 0.028  |
| 3     | ppm | 3.60           | 2.93 | 0.001  | 0.009  | 0.005  | 0.007  | 0.010  | 0.006  |
|       | µM  | 148            | 73.1 | 0.018  | 0.161  | 0.088  | 0.119  | 0.157  | 0.092  |
| 4     | ppm | 3.48           | 2.92 | 0.005  | 0.171  | 0.001  | 0.008  | 0.002  | 0.004  |
|       | µM  | 143            | 72.8 | 0.091  | 3.06   | 0.018  | 0.136  | 0.031  | 0.061  |
| 5*    | ppm | 3.66           | 3.14 | 0      | 0.067  | 0      | 0.010  | 0.004  | 0.008  |
|       | µM  | 151            | 78.3 | 0      | 1.19   | 0      | 0.170  | 0.058  | 0.128  |
|       |     | <b>+Ca(II)</b> |      |        |        |        |        |        |        |
| Trial |     | Mg             | Ca   | Mn     | Fe     | Co     | Ni     | Cu     | Zn     |
| 1     | ppm | 3.75           | 79.4 | 0.0044 | 0.019  | 0.0069 | 0.0121 | 0.0083 | 0.0125 |
|       | µM  | 154            | 1980 | 0.080  | 0.340  | 0.121  | 0.206  | 0.131  | 0.191  |
| 2     | ppm | 3.85           | 75.1 | 0      | 0      | 0      | 0      | 0.0003 | 0.0005 |
|       | µM  | 158            | 1870 | 0      | 0      | 0      | 0      | 0.005  | 0.008  |
| 3     | ppm | 3.57           | 72.0 | 0.001  | 0.007  | 0.006  | 0.004  | 0.008  | 0.004  |
|       | µM  | 147            | 1800 | 0.018  | 0.125  | 0.105  | 0.068  | 0.126  | 0.061  |
| 4     | ppm | 3.48           | 82.7 | 0      | 0      | 0      | 0.003  | 0.001  | 0.005  |
|       | µM  | 143            | 2060 | 0      | 0      | 0      | 0.051  | 0.016  | 0.076  |
| 5*    | ppm | 3.87           | 77.5 | 0      | 0.038  | 0.001  | 0.011  | 0.001  | 0.007  |
|       | µM  | 159            | 1930 | 0      | 0.682  | 0.009  | 0.187  | 0.022  | 0.104  |

\*Sample 5 was incubated at 4°C for t = 20 h.

**Supplementary Table 5. Metal analysis of medium (-BME) treated with 250 µg/mL CP-Ser**

|       |     | <b>-Ca(II)</b> |      |        |        |        |       |        |       |
|-------|-----|----------------|------|--------|--------|--------|-------|--------|-------|
| Trial |     | Mg             | Ca   | Mn     | Fe     | Co     | Ni    | Cu     | Zn    |
| 1     | ppm | 3.29           | 2.98 | 0.002  | 0.082  | 0.003  | 0.007 | 0.008  | 0.007 |
|       | µM  | 135            | 74.4 | 0.029  | 1.46   | 0.053  | 0.114 | 0.120  | 0.109 |
| 2     | ppm | 3.76           | 3.22 | 0.004  | 0.107  | 0.001  | 0.010 | 0.013  | 0.006 |
|       | µM  | 155            | 80.3 | 0.066  | 1.91   | 0.011  | 0.162 | 0.198  | 0.096 |
| 3     | ppm | 3.80           | 2.77 | 0      | 0.026  | 0      | 0.018 | 0.017  | 0.058 |
|       | µM  | 156            | 69.1 | 0      | 0.469  | 0      | 0.303 | 0.260  | 0.275 |
|       |     | <b>+Ca(II)</b> |      |        |        |        |       |        |       |
| Trial |     | Mg             | Ca   | Mn     | Fe     | Co     | Ni    | Cu     | Zn    |
| 1     | ppm | 3.20           | 73.5 | 0.002  | 0.0215 | 0.0031 | 0.007 | 0.0052 | 0.007 |
|       | µM  | 132            | 1830 | 0.031  | 0.385  | 0.054  | 0.116 | 0.082  | 0.106 |
| 2     | ppm | 3.71           | 95.1 | 0.004  | 0.059  | 0.002  | 0.008 | 0.011  | 0.007 |
|       | µM  | 153            | 2370 | 0.064  | 1.06   | 0.035  | 0.133 | 0.173  | 0.102 |
| 3     | ppm | 3.76           | 73.9 | 0.0003 | 0.036  | 0      | 0.008 | 0.0002 | 0.001 |
|       | µM  | 155            | 1840 | 0.005  | 0.639  | 0      | 0.128 | 0.003  | 0.017 |

**Table S6. Metal analysis of medium (+BME) treated with 250  $\mu\text{g/mL}$  CP-Ser  $\Delta\text{His}_3\text{Asp}$** 

| -Ca(II) |               | Mg   | Ca   | Mn    | Fe     | Co    | Ni    | Cu    | Zn    |
|---------|---------------|------|------|-------|--------|-------|-------|-------|-------|
| 1       | ppm           | 3.55 | 2.81 | 0.001 | 0.050  | 0.005 | 0.007 | 0.015 | 0.006 |
|         | $\mu\text{M}$ | 146  | 70.1 | 0.018 | 0.895  | 0.088 | 0.119 | 0.236 | 0.092 |
| 2       | ppm           | 3.47 | 2.82 | 0.002 | 0.043  | 0.004 | 0.008 | 0.012 | 0.008 |
|         | $\mu\text{M}$ | 143  | 70.4 | 0.031 | 0.763  | 0.063 | 0.133 | 0.187 | 0.128 |
| 3       | ppm           | 3.48 | 2.66 | 0.004 | 0.024  | 0     | 0.010 | 0.011 | 0.005 |
|         | $\mu\text{M}$ | 143  | 66.4 | 0.066 | 0.421  | 0     | 0.170 | 0.173 | 0.069 |
| +Ca(II) |               | Mg   | Ca   | Mn    | Fe     | Co    | Ni    | Cu    | Zn    |
| 1       | ppm           | 3.67 | 73.0 | 0.001 | 0.009  | 0.006 | 0.006 | 0.009 | 0.006 |
|         | $\mu\text{M}$ | 151  | 1820 | 0.018 | 0.161  | 0.105 | 0.102 | 0.142 | 0.092 |
| 2       | ppm           | 3.72 | 80.1 | 0.002 | 0.0004 | 0.004 | 0.011 | 0.004 | 0.008 |
|         | $\mu\text{M}$ | 153  | 2000 | 0.033 | 0.007  | 0.063 | 0.189 | 0.069 | 0.119 |
| 3       | ppm           | 3.92 | 90.2 | 0.004 | 0.007  | 0.002 | 0.008 | 0.008 | 0.006 |
|         | $\mu\text{M}$ | 161  | 2250 | 0.064 | 0.131  | 0.030 | 0.143 | 0.127 | 0.092 |



**Supplementary Table 7. Metal analysis of medium (-BME) treated with 250  $\mu\text{g/mL}$  CP-Ser  $\Delta\text{His}_3\text{Asp}$**

|       |               | <b>-Ca(II)</b> |      |        |        |        |       |        |       |
|-------|---------------|----------------|------|--------|--------|--------|-------|--------|-------|
| Trial |               | Mg             | Ca   | Mn     | Fe     | Co     | Ni    | Cu     | Zn    |
| 1     | ppm           | 3.29           | 2.87 | 0.002  | 0.139  | 0.0032 | 0.006 | 0.0106 | 0.008 |
|       | $\mu\text{M}$ | 135            | 71.6 | 0.029  | 2.49   | 0.056  | 0.095 | 0.167  | 0.124 |
| 2     | ppm           | 3.87           | 3.18 | 0.004  | 0.151  | 0.001  | 0.009 | 0.016  | 0.006 |
|       | $\mu\text{M}$ | 159            | 79.3 | 0.066  | 2.70   | 0.023  | 0.152 | 0.257  | 0.090 |
| 3     | ppm           | 3.91           | 3.36 | 0.0001 | 0.097  | 0.001  | 0.011 | 0.004  | 0.005 |
|       | $\mu\text{M}$ | 161            | 83.8 | 0.002  | 1.73   | 0.012  | 0.184 | 0.065  | 0.081 |
|       |               | <b>+Ca(II)</b> |      |        |        |        |       |        |       |
| Trial |               | Mg             | Ca   | Mn     | Fe     | Co     | Ni    | Cu     | Zn    |
| 1     | ppm           | 3.44           | 72.1 | 0.002  | 0.132  | 0.004  | 0.006 | 0.008  | 0.009 |
|       | $\mu\text{M}$ | 142            | 1800 | 0.040  | 2.37   | 0.061  | 0.104 | 0.120  | 0.132 |
| 2     | ppm           | 4.02           | 86.0 | 0.004  | 0.0531 | 0.0022 | 0.008 | 0.0125 | 0.012 |
|       | $\mu\text{M}$ | 165            | 2140 | 0.067  | 0.951  | 0.039  | 0.135 | 0.197  | 0.184 |
| 3     | ppm           | 3.90           | 75.4 | 0      | 0.085  | 0.001  | 0.011 | 0.003  | 0.005 |
|       | $\mu\text{M}$ | 160            | 1880 | 0      | 1.51   | 0.012  | 0.187 | 0.042  | 0.078 |

**Supplementary Table 8. Metal analysis of medium (+BME) treated with 250  $\mu\text{g}/\text{mL}$  CP-Ser  $\Delta\text{His}_4$**

|       |               | <b>-Ca(II)</b> |      |       |       |       |       |       |       |
|-------|---------------|----------------|------|-------|-------|-------|-------|-------|-------|
| Trial |               | Mg             | Ca   | Mn    | Fe    | Co    | Ni    | Cu    | Zn    |
| 1     | ppm           | 3.52           | 3.02 | 0.005 | 0.173 | 0.001 | 0.010 | 0.006 | 0.008 |
|       | $\mu\text{M}$ | 145            | 75.3 | 0.091 | 3.10  | 0.018 | 0.170 | 0.094 | 0.122 |
| 2     | ppm           | 3.39           | 2.89 | 0.009 | 0.171 | 0.003 | 0.014 | 0.012 | 0.006 |
|       | $\mu\text{M}$ | 139            | 72.1 | 0.158 | 3.06  | 0.049 | 0.245 | 0.181 | 0.098 |
| 3     | ppm           | 3.73           | 3.09 | 0.011 | 0.192 | 0.001 | 0.017 | 0.017 | 0.007 |
|       | $\mu\text{M}$ | 153            | 77.1 | 0.195 | 3.43  | 0.014 | 0.296 | 0.269 | 0.102 |
|       |               | <b>+Ca(II)</b> |      |       |       |       |       |       |       |
| Trial |               | Mg             | Ca   | Mn    | Fe    | Co    | Ni    | Cu    | Zn    |
| 1     | ppm           | 3.43           | 82.8 | 0.005 | 0.158 | 0.001 | 0.010 | 0.007 | 0.006 |
|       | $\mu\text{M}$ | 141            | 2070 | 0.091 | 2.83  | 0.018 | 0.170 | 0.110 | 0.092 |
| 2     | ppm           | 2.93           | 76.6 | 0.014 | 0.148 | 0.001 | 0.019 | 0.013 | 0.014 |
|       | $\mu\text{M}$ | 121            | 1910 | 0.253 | 2.65  | 0.018 | 0.319 | 0.211 | 0.216 |
| 3     | ppm           | 3.89           | 92.5 | 0.010 | 0.167 | 0.002 | 0.018 | 0.015 | 0.008 |
|       | $\mu\text{M}$ | 160            | 2310 | 0.175 | 2.98  | 0.026 | 0.312 | 0.242 | 0.115 |

**Supplementary Table 9. Metal analysis of medium (+BME) treated with 250 µg/mL CP-Ser-AAA**

| -Ca(II) |     |      |      |       |       |       |       |       |       |
|---------|-----|------|------|-------|-------|-------|-------|-------|-------|
| Trial   |     | Mg   | Ca   | Mn    | Fe    | Co    | Ni    | Cu    | Zn    |
| 1       | ppm | 3.46 | 3.12 | 0.005 | 0.168 | 0.002 | 0.007 | 0.016 | 0.011 |
|         | µM  | 142  | 77.8 | 0.091 | 3.01  | 0.035 | 0.119 | 0.252 | 0.168 |
| 2       | ppm | 3.69 | 3.23 | 0.007 | 0.176 | 0.002 | 0.013 | 0.016 | 0.013 |
|         | µM  | 152  | 80.6 | 0.129 | 3.15  | 0.028 | 0.225 | 0.252 | 0.194 |
| 3       | ppm | 3.90 | 2.80 | 0.010 | 0.124 | 0     | 0.005 | 0.018 | 0.010 |
|         | µM  | 160  | 69.9 | 0.182 | 2.23  | 0     | 0.083 | 0.275 | 0.157 |
| +Ca(II) |     |      |      |       |       |       |       |       |       |
| Trial   |     | Mg   | Ca   | Mn    | Fe    | Co    | Ni    | Cu    | Zn    |
| 1       | ppm | 3.37 | 82.7 | 0.002 | 0.164 | 0.001 | 0.004 | 0.006 | 0.005 |
|         | µM  | 139  | 2060 | 0.036 | 2.94  | 0.018 | 0.068 | 0.094 | 0.076 |
| 2       | ppm | 3.81 | 90.3 | 0.009 | 0.162 | 0.001 | 0.010 | 0.015 | 0.007 |
|         | µM  | 157  | 2250 | 0.160 | 2.89  | 0.025 | 0.172 | 0.234 | 0.104 |
| 3       | ppm | 3.50 | 69.6 | 0     | 0.124 | 0     | 0.012 | 0.012 | 0.013 |
|         | µM  | 144  | 1740 | 0     | 2.22  | 0     | 0.196 | 0.186 | 0.202 |

**Supplementary Table 10. Metal analysis of medium (+BME) treated with 250 µg/mL CP-Ser ΔΔ**

|       |     | <b>-Ca(II)</b> |      |       |       |       |       |       |       |
|-------|-----|----------------|------|-------|-------|-------|-------|-------|-------|
| Trial |     | Mg             | Ca   | Mn    | Fe    | Co    | Ni    | Cu    | Zn    |
| 1     | ppm | 3.53           | 3.51 | 0.009 | 0.176 | 0.006 | 0.012 | 0.017 | 0.294 |
|       | µM  | 145            | 87.6 | 0.164 | 3.15  | 0.105 | 0.204 | 0.268 | 4.50  |
| 2     | ppm | 3.51           | 3.70 | 0.006 | 0.181 | 0.002 | 0.010 | 0.005 | 0.313 |
|       | µM  | 144            | 92.3 | 0.109 | 3.24  | 0.035 | 0.170 | 0.079 | 4.79  |
| 3     | ppm | 3.46           | 3.56 | 0.010 | 0.188 | 0.004 | 0.018 | 0.012 | 0.312 |
|       | µM  | 142            | 88.8 | 0.173 | 3.37  | 0.061 | 0.300 | 0.181 | 4.77  |
|       |     | <b>+Ca(II)</b> |      |       |       |       |       |       |       |
| Trial |     | Mg             | Ca   | Mn    | Fe    | Co    | Ni    | Cu    | Zn    |
| 1     | ppm | 3.53           | 72.0 | 0.009 | 0.163 | 0.006 | 0.011 | 0.016 | 0.227 |
|       | µM  | 145            | 1800 | 0.164 | 2.92  | 0.105 | 0.187 | 0.252 | 3.47  |
| 2     | ppm | 3.40           | 83.4 | 0.006 | 0.171 | 0.002 | 0.009 | 0.008 | 0.286 |
|       | µM  | 140            | 2080 | 0.109 | 3.06  | 0.035 | 0.153 | 0.126 | 4.37  |
| 3     | ppm | 3.45           | 74.3 | 0.009 | 0.177 | 0.004 | 0.016 | 0.010 | 0.245 |
|       | µM  | 142            | 1850 | 0.167 | 3.16  | 0.074 | 0.274 | 0.153 | 3.75  |

**Supplementary Table 11. Metal analysis of untreated MRS-modified medium (+BME)**

| -Ca(II) |     | Mg   | Ca   | Mn   | Fe    | Co    | Ni    | Cu    | Zn    |
|---------|-----|------|------|------|-------|-------|-------|-------|-------|
| Trial   |     |      |      |      |       |       |       |       |       |
| 1       | ppm | 13.2 | 4.76 | 5.47 | 0.286 | 0.069 | 0.004 | 0.011 | 0.725 |
|         | μM  | 543  | 119  | 99.6 | 5.12  | 1.17  | 0.068 | 0.173 | 11.1  |
| 2       | ppm | 13.1 | 4.74 | 5.31 | 0.280 | 0.013 | 0.011 | 0.010 | 0.675 |
|         | μM  | 538  | 118  | 96.7 | 5.01  | 0.221 | 0.187 | 0.157 | 10.3  |
| 3       | ppm | 12.1 | 4.15 | 4.91 | 0.224 | 0.010 | 0.010 | 0.010 | 0.634 |
|         | μM  | 499  | 104  | 89.4 | 4.01  | 0.170 | 0.170 | 0.157 | 9.70  |
| +Ca(II) |     | Mg   | Ca   | Mn   | Fe    | Co    | Ni    | Cu    | Zn    |
| Trial   |     |      |      |      |       |       |       |       |       |
| 1       | ppm | 13.8 | 79.1 | 5.63 | 0.298 | 0.008 | 0.002 | 0.010 | 0.766 |
|         | μM  | 567  | 1970 | 102  | 5.34  | 0.136 | 0.034 | 0.157 | 11.7  |
| 2       | ppm | 13.2 | 78.2 | 5.22 | 0.263 | 0.014 | 0.013 | 0.008 | 0.668 |
|         | μM  | 544  | 1950 | 95.0 | 4.71  | 0.238 | 0.222 | 0.126 | 10.2  |
| 3       | ppm | 12.3 | 70.9 | 4.92 | 0.225 | 0.010 | 0.009 | 0.009 | 0.637 |
|         | μM  | 507  | 1770 | 89.6 | 4.03  | 0.170 | 0.153 | 0.142 | 9.74  |

**Supplementary Table 12: Metal analysis of MRS-modified medium (+BME) treated with 250  $\mu$ g/mL CP-Ser**

|       |         | <b>-Ca(II)</b> |      |      |       |       |       |       |       |
|-------|---------|----------------|------|------|-------|-------|-------|-------|-------|
| Trial |         | Mg             | Ca   | Mn   | Fe    | Co    | Ni    | Cu    | Zn    |
| 1     | ppm     | 13.3           | 3.75 | 4.96 | 0.241 | 0.008 | 0.013 | 0.007 | 0.024 |
|       | $\mu$ M | 545            | 93.6 | 90.3 | 4.32  | 0.136 | 0.222 | 0.110 | 0.367 |
| 2     | ppm     | 10.7           | 3.78 | 3.94 | 0.213 | 0.008 | 0.003 | 0.010 | 0.027 |
|       | $\mu$ M | 441            | 94.3 | 71.7 | 3.81  | 0.136 | 0.051 | 0.157 | 0.413 |
| 3     | ppm     | 11.5           | 3.05 | 4.20 | 0.180 | 0.008 | 0.006 | 0.007 | 0.021 |
|       | $\mu$ M | 473            | 76.1 | 76.4 | 3.22  | 0.136 | 0.102 | 0.110 | 0.321 |
|       |         | <b>+Ca(II)</b> |      |      |       |       |       |       |       |
| Trial |         | Mg             | Ca   | Mn   | Fe    | Co    | Ni    | Cu    | Zn    |
| 1     | ppm     | 15.3           | 87.7 | 5.70 | 0.278 | 0.008 | 0.013 | 0     | 0.076 |
|       | $\mu$ M | 627            | 2190 | 104  | 4.98  | 0.136 | 0.222 | 0     | 1.16  |
| 2     | ppm     | 12.8           | 76.3 | 4.64 | 0.262 | 0.013 | 0.011 | 0.010 | 0.052 |
|       | $\mu$ M | 528            | 1900 | 84.5 | 4.69  | 0.221 | 0.187 | 0.157 | 0.795 |
| 3     | ppm     | 12.3           | 66.8 | 4.49 | 0.219 | 0.009 | 0.010 | 0.009 | 0.030 |
|       | $\mu$ M | 504            | 1670 | 81.7 | 3.92  | 0.153 | 0.170 | 0.142 | 0.459 |

**Supplementary Table 13: Metal analysis of MRS-modified medium (-BME) treated with 250  $\mu$ g/mL CP-Ser**

|       |         | <b>-Ca(II)</b> |      |      |       |       |       |       |       |
|-------|---------|----------------|------|------|-------|-------|-------|-------|-------|
| Trial |         | Mg             | Ca   | Mn   | Fe    | Co    | Ni    | Cu    | Zn    |
| 1     | ppm     | 13.1           | 3.70 | 4.94 | 0.235 | 0.008 | 0.011 | 0.009 | 0.030 |
|       | $\mu$ M | 538            | 92.3 | 89.9 | 4.21  | 0.136 | 0.187 | 0.142 | 0.459 |
| 2     | ppm     | 11.4           | 3.96 | 4.20 | 0.221 | 0.008 | 0.005 | 0.013 | 0.023 |
|       | $\mu$ M | 468            | 98.8 | 76.4 | 3.96  | 0.136 | 0.085 | 0.205 | 0.352 |
| 3     | ppm     | 11.6           | 3.24 | 4.20 | 0.179 | 0.009 | 0.006 | 0.010 | 0.023 |
|       | $\mu$ M | 478            | 80.8 | 76.4 | 3.21  | 0.153 | 0.102 | 0.157 | 0.352 |
|       |         | <b>+Ca(II)</b> |      |      |       |       |       |       |       |
| Trial |         | Mg             | Ca   | Mn   | Fe    | Co    | Ni    | Cu    | Zn    |
| 1     | ppm     | 13.1           | 74.2 | 5.10 | 0.238 | 0.006 | 0.006 | 0.001 | 0.194 |
|       | $\mu$ M | 537            | 1850 | 92.8 | 4.26  | 0.102 | 0.102 | 0.016 | 2.97  |
| 2     | ppm     | 13.0           | 74.9 | 4.67 | 0.259 | 0.013 | 0.012 | 0.015 | 0.047 |
|       | $\mu$ M | 533            | 1870 | 85.0 | 4.64  | 0.221 | 0.204 | 0.236 | 0.719 |
| 3     | ppm     | 11.8           | 67.0 | 4.32 | 0.179 | 0.011 | 0.007 | 0.009 | 0.090 |
|       | $\mu$ M | 485            | 1670 | 78.6 | 3.21  | 0.187 | 0.119 | 0.142 | 1.38  |

**Supplementary Table 14.** Fe(II) buffering conditions of Zinpyr-1 (ZP1)  $K_{d,Fe(II)}$  determination

| Ligand               | $K_{d,Fe(II)}$ (M)     | Reference | [Ligand] (M)         | $[Fe(II)]_{total}$ (M) | $[Fe(II)]_{free}$ (M)  |
|----------------------|------------------------|-----------|----------------------|------------------------|------------------------|
| EDTA <sup>a</sup>    | $4.68 \times 10^{-15}$ | 1         | $1.0 \times 10^{-3}$ | $1.0 \times 10^{-4}$   | $4.68 \times 10^{-16}$ |
|                      |                        |           |                      | $9.0 \times 10^{-4}$   | $4.21 \times 10^{-15}$ |
| NTA <sup>b</sup>     | $1.45 \times 10^{-9}$  | 2         | $1.0 \times 10^{-3}$ | $1.0 \times 10^{-8}$   | $1.45 \times 10^{-14}$ |
|                      |                        |           |                      | $1.0 \times 10^{-7}$   | $1.45 \times 10^{-13}$ |
|                      |                        |           |                      | $1.0 \times 10^{-6}$   | $1.45 \times 10^{-12}$ |
|                      |                        |           |                      | $1.0 \times 10^{-5}$   | $1.45 \times 10^{-11}$ |
|                      |                        |           |                      | $1.0 \times 10^{-4}$   | $1.45 \times 10^{-10}$ |
|                      |                        |           |                      | $9.9 \times 10^{-4}$   | $1.44 \times 10^{-9}$  |
| TPA <sup>c</sup>     | $2.24 \times 10^{-9}$  | 3         | $1.0 \times 10^{-3}$ | $1.0 \times 10^{-9}$   | $2.24 \times 10^{-15}$ |
|                      |                        |           |                      | $1.0 \times 10^{-8}$   | $2.24 \times 10^{-14}$ |
|                      |                        |           |                      | $5.0 \times 10^{-8}$   | $1.12 \times 10^{-13}$ |
|                      |                        |           |                      | $1.0 \times 10^{-7}$   | $2.24 \times 10^{-13}$ |
|                      |                        |           |                      | $2.0 \times 10^{-7}$   | $4.48 \times 10^{-13}$ |
|                      |                        |           |                      | $5.0 \times 10^{-7}$   | $1.12 \times 10^{-12}$ |
|                      |                        |           |                      | $8.0 \times 10^{-7}$   | $1.79 \times 10^{-12}$ |
|                      |                        |           |                      | $1.0 \times 10^{-6}$   | $2.24 \times 10^{-12}$ |
|                      |                        |           |                      | $2.0 \times 10^{-6}$   | $4.48 \times 10^{-12}$ |
|                      |                        |           |                      | $5.0 \times 10^{-6}$   | $1.12 \times 10^{-11}$ |
|                      |                        |           |                      | $8.0 \times 10^{-6}$   | $1.79 \times 10^{-11}$ |
|                      |                        |           |                      | $1.0 \times 10^{-5}$   | $2.24 \times 10^{-11}$ |
|                      |                        |           |                      | $1.0 \times 10^{-4}$   | $4.48 \times 10^{-11}$ |
|                      |                        |           |                      | $2.0 \times 10^{-4}$   | $1.12 \times 10^{-10}$ |
|                      |                        |           |                      | $4.0 \times 10^{-4}$   | $1.79 \times 10^{-10}$ |
| $6.0 \times 10^{-4}$ | $2.24 \times 10^{-10}$ |           |                      |                        |                        |
| $8.0 \times 10^{-4}$ | $4.48 \times 10^{-10}$ |           |                      |                        |                        |
| $9.0 \times 10^{-4}$ | $8.96 \times 10^{-10}$ |           |                      |                        |                        |
| $9.9 \times 10^{-4}$ | $1.34 \times 10^{-9}$  |           |                      |                        |                        |
| Citrate              | $3.33 \times 10^{-8}$  | 4         | $1.0 \times 10^{-3}$ | $9.0 \times 10^{-4}$   | $3.00 \times 10^{-8}$  |

<sup>a</sup> Ethylenediaminetetraacetic acid. <sup>b</sup> Nitritotriacetic acid. <sup>c</sup> Tris(2-pyridylmethyl)amine.



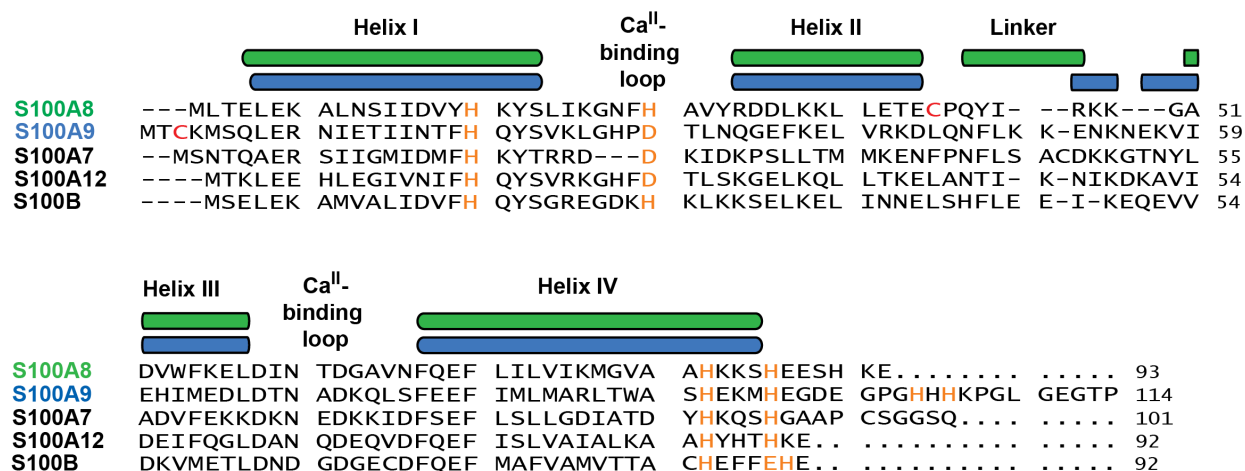

**Supplementary Figure 1.** Amino acid sequence alignment of human S100A8, S100A9, S100A7, S100A12, and S100B. The secondary structural elements of S100A8 (green) and S100A9 (blue) are presented above the sequences. The cysteine residues, (A8)Cys42 and (A9)Cys3, mutated to serine are red. The transition metal-binding residues are orange.

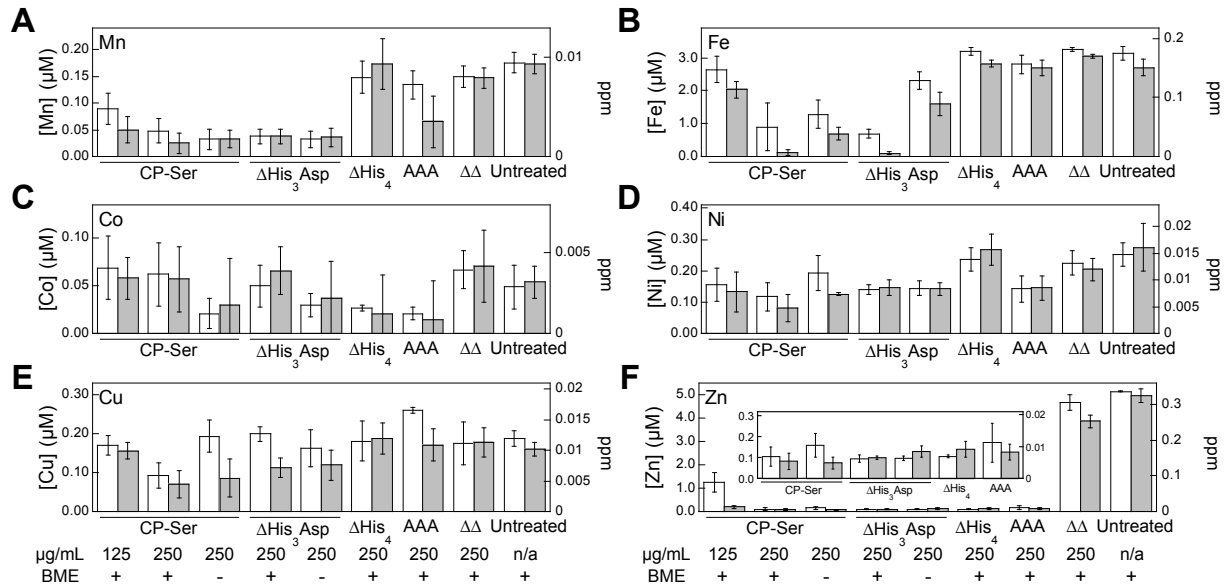

**Supplementary Figure 2** Metal analyses of CP-treated medium for Mn (A), Fe (B), Co (C), Ni (D), Cu (E), and Zn (F). Medium treated with 125 or 250 μM /mL CP in the absence (white bars) and presence (gray bars) of 2 mM Ca(II). The concentration of protein and presence (+) or absence (-) of 3.1 mM BME in the media are indicated below. Concentration values in μM (left axes) and ppm (right axes) are reported (mean ± SEM,  $n \geq 3$ ). The plots for Mn, Fe, and Zn appear in the main text and are reproduced here for comparison.

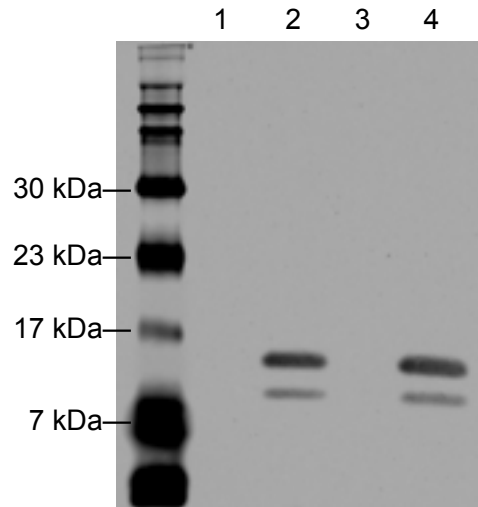

**Supplementary Figure 3.** Western blot analysis of CP-treated medium and flow through after filtration. Medium treated with 250  $\mu\text{g/mL}$  CP-Ser, (lane 1) flow through -Ca(II), (lane 2) before filtration -Ca(II), (lane 3) flow through +Ca(II), and (lane 4) before filtration +Ca(II).

### A. Preparation of CP-treated medium

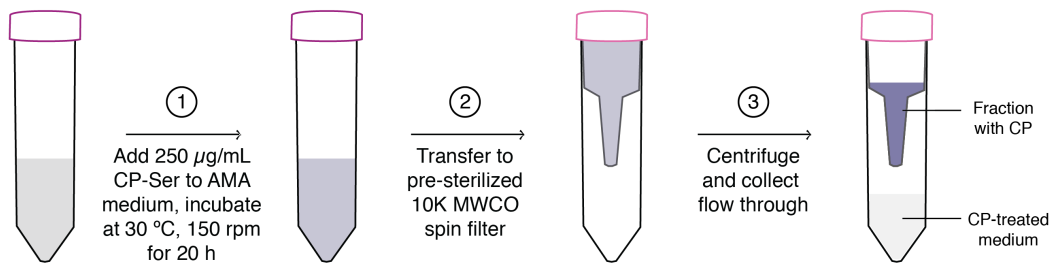

### B. Bacterial growth in metal-substituted medium

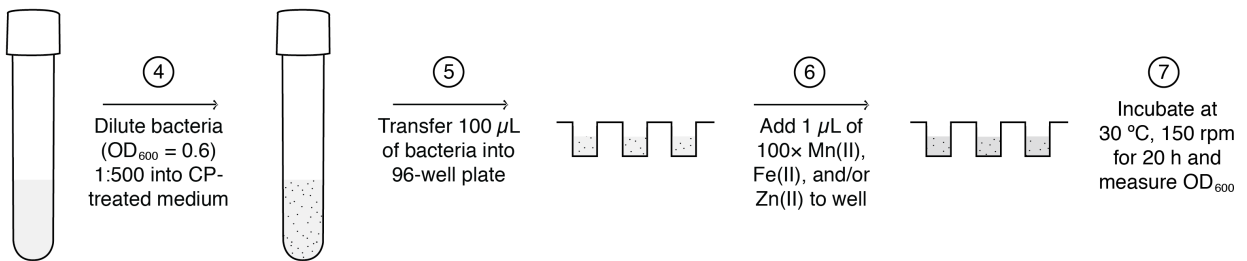

**Supplementary Figure 4** Schematic cartoon of metal-substitution bacterial growth assay procedure.

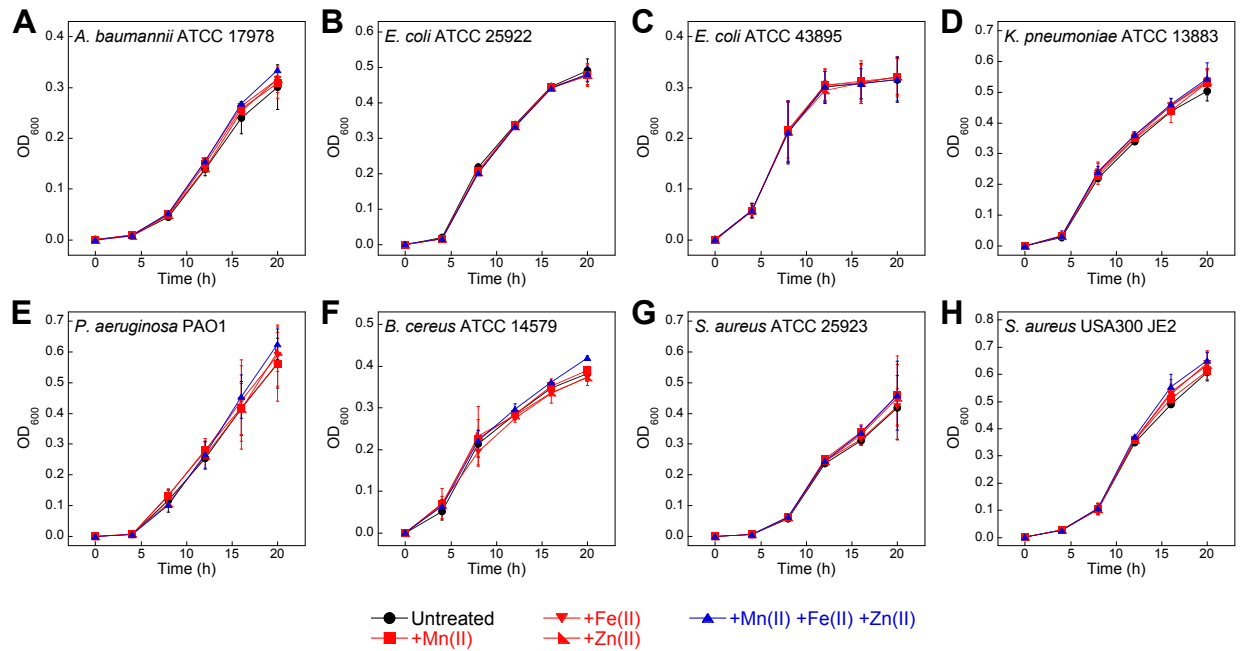

**Supplementary Figure 5.** Growth curves of Gram-negative and Gram-positive bacteria cultured in medium (+Ca(II), +BME) that was not treated with CP and was supplemented with 0.15  $\mu\text{M}$  Mn(II), 3  $\mu\text{M}$  Fe(II), and/or 5  $\mu\text{M}$  Zn(II) (mean  $\pm$  SDM,  $n = 2$ ).

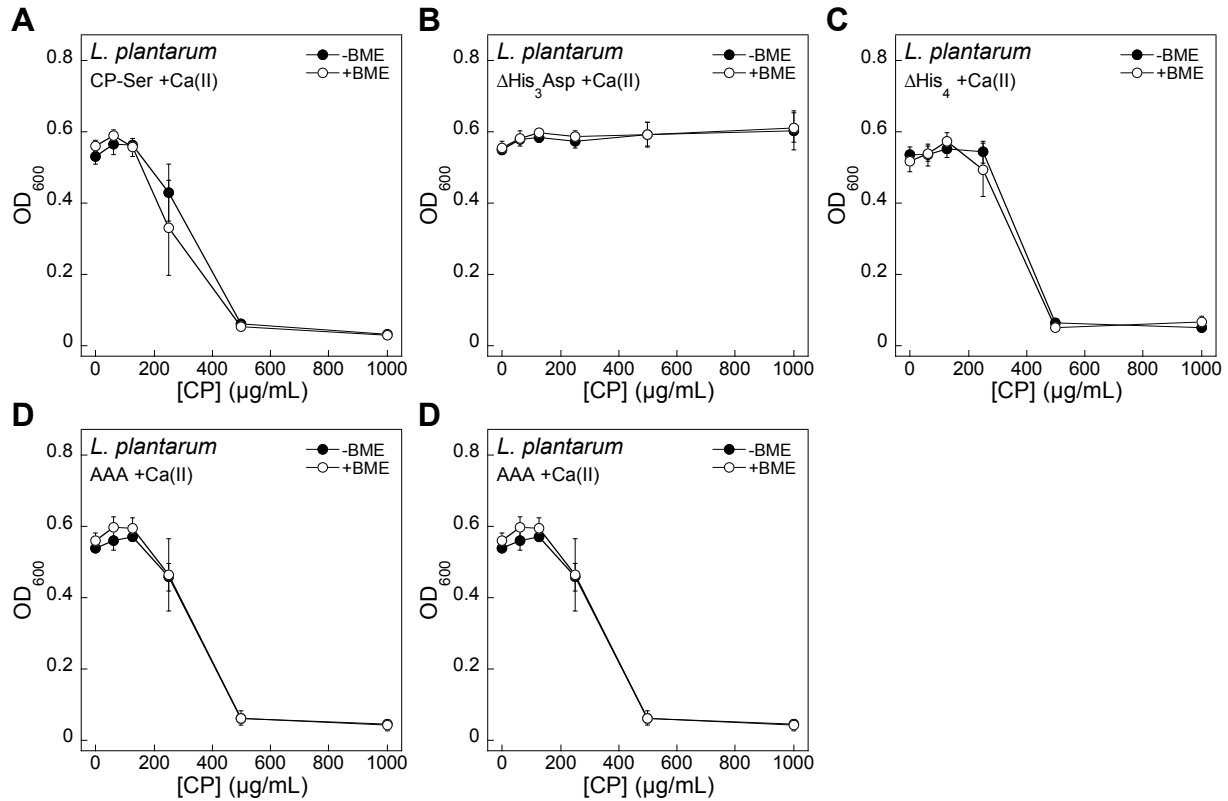

**Supplementary Figure 6.** Antimicrobial activity assays of CP against *L. plantarum*. Bacterial cultures were incubated with CP-Ser (A), CP-Ser ΔHis<sub>3</sub>Asp (B), CP-Ser ΔHis<sub>4</sub> (C), CP-Ser-AAA (D), and CP-Ser ΔΔ (E) in the absence (solid circles) and presence (open circles) of 3.1 mM BME in the medium. The OD<sub>600</sub> values were recorded at t = 20 h (mean ± SEM, n = 3).

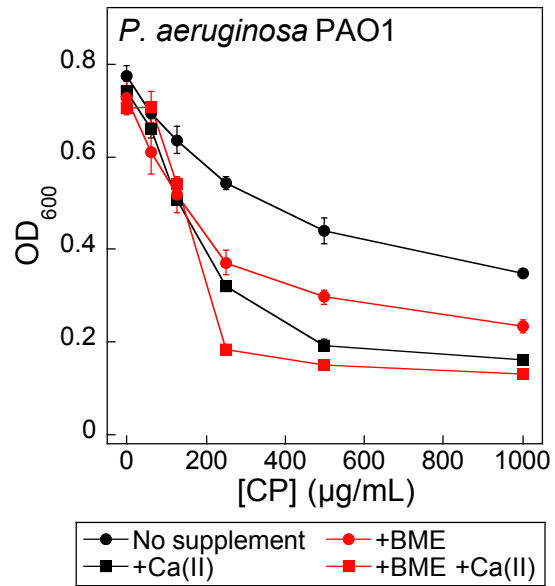

**Supplementary Figure 7.** Antimicrobial activity of CP against *P. aeruginosa* PAO1 in the absence and presence of ~3 mM BME and/or 2 mM Ca(II). The OD<sub>600</sub> values were recorded at t = 20 h (mean ± SEM, n = 3).

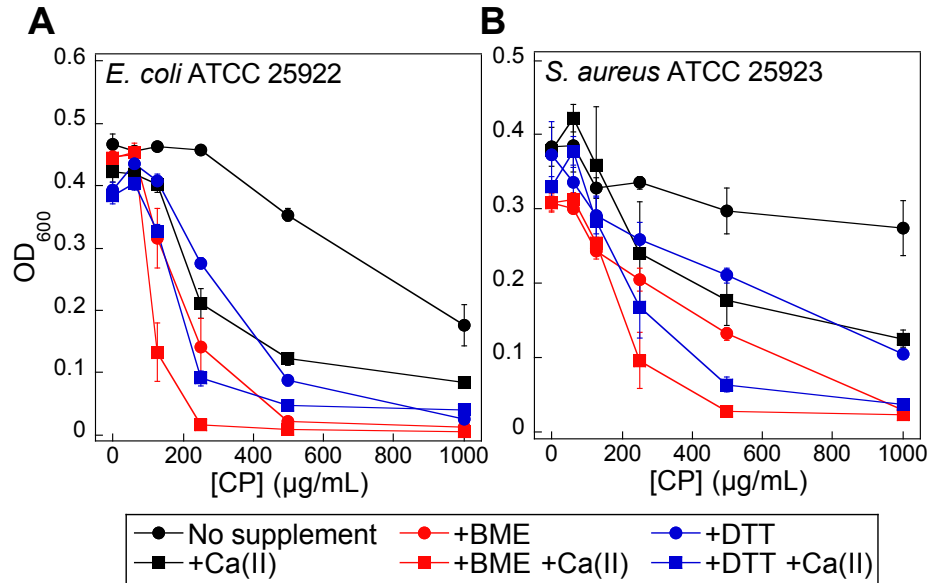

**Supplementary Figure 8.** Antimicrobial activity assays against *E. coli* ATCC 25922 (**A**) and *S. aureus* ATCC 25923 (**B**) with BME or DTT in the growth medium. The medium was supplemented with either no reducing agent (black), 3.1 mM BME (red), or 1.6 mM DTT (blue), in the absence (circles) and presence (squares) of a 2-mM Ca(II) supplement. The OD<sub>600</sub> values were recorded at t = 20 h (mean ± SEM, n = 3).



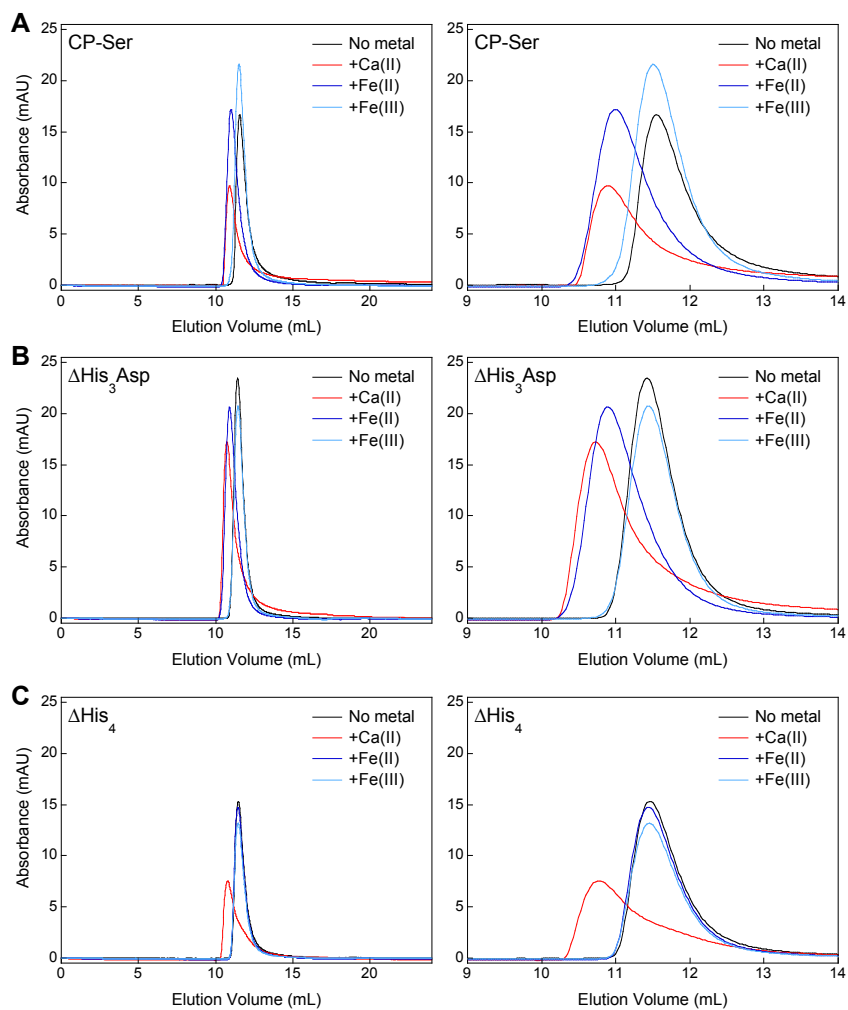

**Supplementary Figure 9.** Analytical size-exclusion chromatography (SEC) of CP-Ser (**A**), CP-Ser  $\Delta$ His<sub>3</sub>Asp (**B**), and CP-Ser  $\Delta$ His<sub>4</sub> (**C**) preincubated with 5 equiv of Fe(II) (blue line) or Fe(III) (light blue line) in 75 mM HEPES, 100 mM NaCl, pH 7.0. The chromatograms with no metal addition (black line) and with 2 mM Ca(II) in the running buffer (red line) are shown. Protein concentration was 20  $\mu$ M, and sample volume was 100  $\mu$ L.

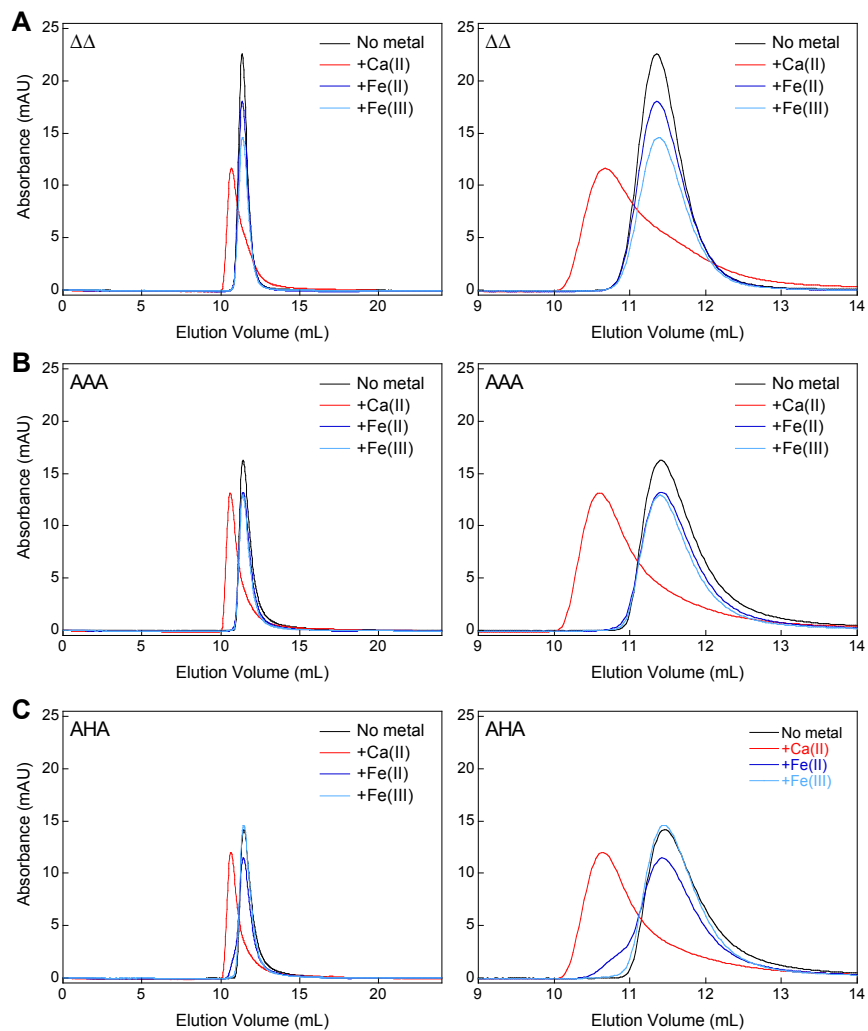

**Supplementary Figure 10.** Analytical SEC of CP-Ser  $\Delta\Delta$  (A), CP-Ser-AAA (B), and CP-Ser-AHA (C) pre-incubated with 5 equiv of Fe(II) (blue line) or Fe(III) (light blue line) in 75 mM HEPES, 100 mM NaCl, pH 7.0. The chromatograms with no metal addition (black line) and with 2 mM Ca(II) in the running buffer (red line) are shown. Protein concentration was 20  $\mu$ M, and sample volume was 100  $\mu$ L.

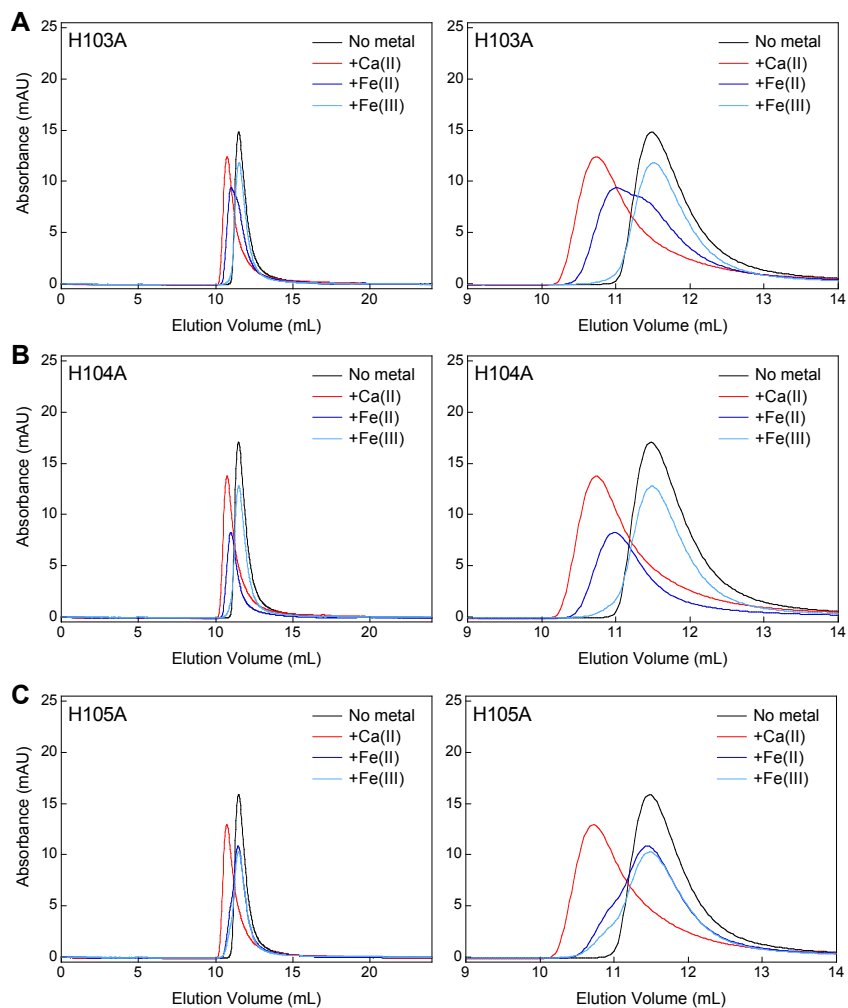

**Supplementary Figure 11.** Analytical SEC of CP-Ser(H103A) (**A**), CP-Ser(H104A) (**B**), and CP-Ser(H105A) (**C**) preincubated with 5 equiv of Fe(II) (blue line) or Fe(III) (light blue line) in 75 mM HEPES, 100 mM NaCl, pH 7.0. The chromatograms with no metal addition (black line) and with 2 mM Ca(II) in the running buffer (red line) are shown. Protein concentration was 20  $\mu$ M, and sample volume was 100  $\mu$ L.

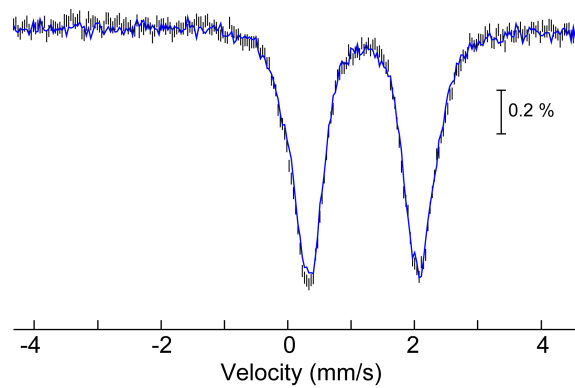

**Supplementary Figure 12.** Comparison of 4.2-K/53-mT Mössbauer spectra of  $^{57}\text{Fe}$ -bound CP-Ser (black hashed marks) and the  $\Delta\text{His}_3\text{Asp}$  variant (blue solid line) in a solution of 90% (v/v) 75 mM HEPES, 100 mM NaCl, pH 7.0 and 10% (v/v) glycerol.

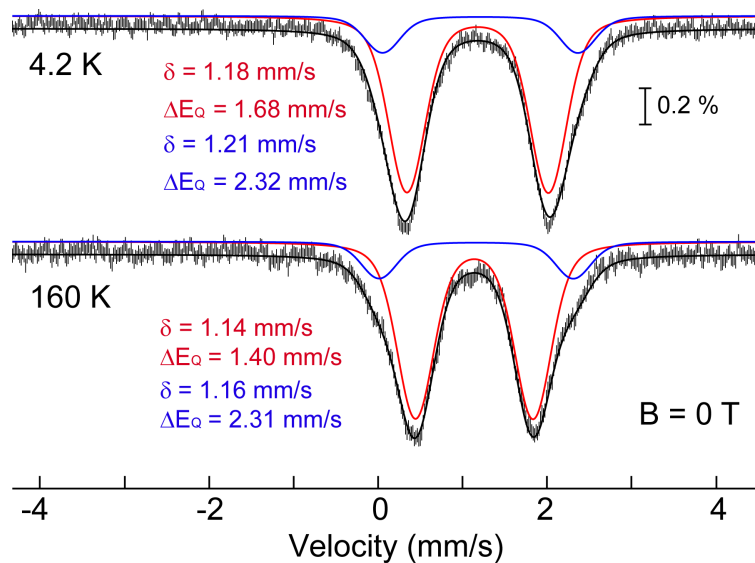

**Supplementary Figure 13.** Mössbauer spectra of  $^{55}\text{Fe}$ -bound CP-Ser in a solution of 90% (v/v) 75 mM HEPES, 100 mM NaCl, pH 7.0 and 10% (v/v) glycerol collected at 4.2 K (top, vertical bars) and at 160 K (bottom, vertical bars) without an externally applied magnetic field. The spectra can be simulated with two quadrupole doublets. The solid red and blue lines are simulations of the individual subspectra of the major (83% of total intensity) and minor (17% of total intensity) component, respectively, while the solid black line is the summation of the subspectra. The simulation parameters are shown color-coded on the spectra.

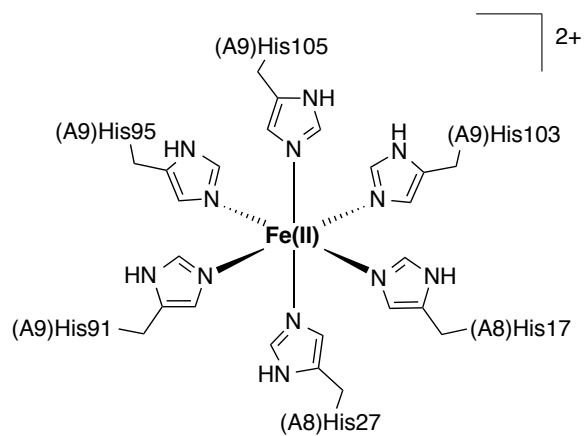

**Supplementary Figure 14.** Proposed Fe(II) coordination site of CP.

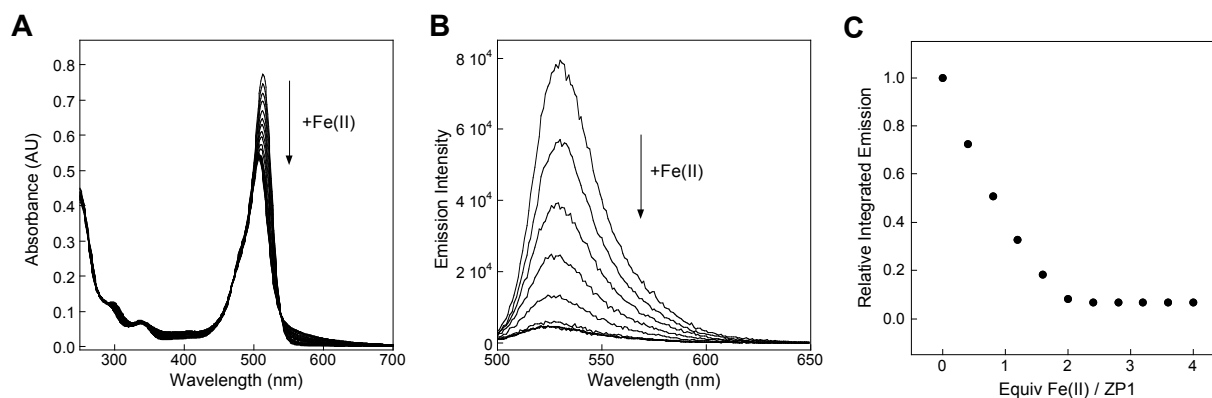

**Supplementary Figure 15.** Titration of ZP1 with 0 to 4.0 equiv Fe(II) monitored by optical absorption and emission spectroscopies (75 mM HEPES, 100 mM NaCl, pH 7.0). **(A)** The absorption spectra of 10  $\mu\text{M}$  ZP1 with the addition of Fe(II). The  $\lambda_{\text{max}}$  shifts from 513 nm ( $\epsilon = 77,000 \text{ M}^{-1} \text{ cm}^{-1}$ ) to 506 nm ( $\epsilon = 54,000 \text{ M}^{-1} \text{ cm}^{-1}$ ). **(B)** The emission spectra of 1  $\mu\text{M}$  ZP1 with the addition of Fe(II). There is a  $\sim 12$ -fold turn off response in the presence of  $>2$  eq Fe(II). There is a slight blue shift in  $\lambda_{\text{em}}$  from 530 nm to 525 nm with Fe(II) addition. **(C)** Relative integrated emission of 1  $\mu\text{M}$  ZP1 with the addition of Fe(II).

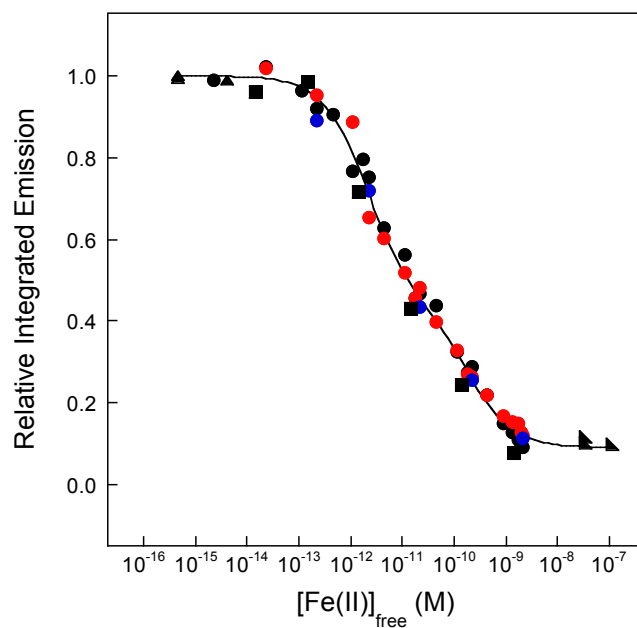

**Supplementary Figure 16.** ZP1  $K_{d,Fe(II)}$  determination. The relative integrated emission of ZP1 was measured in Fe(II) solutions buffered with TPA (circles), NTA (squares), EDTA (up triangles), and citrate (right triangles) in 75 mM HEPES, 100 mM NaCl, pH 7.0. The different colors represent independent trials. The black line represents the fit ( $K_{d1,Fe(II)} = 2.15 \pm 0.25$  pM,  $K_{d2,Fe(II)} = 190 \pm 41$  pM).



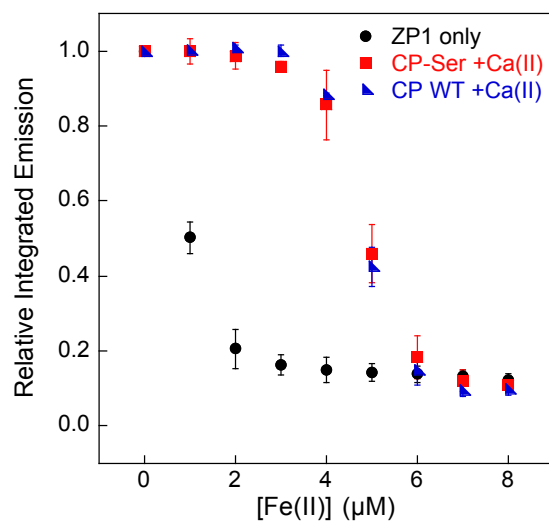

**Supplementary Figure 17.** Emission of ZP1 (1 μM) in the presence of 4 μM CP-Ser or native CP and 200 μM Ca(II) (75 mM HEPES, 100 mM NaCl, pH 7.0) after >12 h of incubation. The integrated emission values were normalized to that of the Fe(II)-free sample (mean ± SDM,  $n = 3$ ).

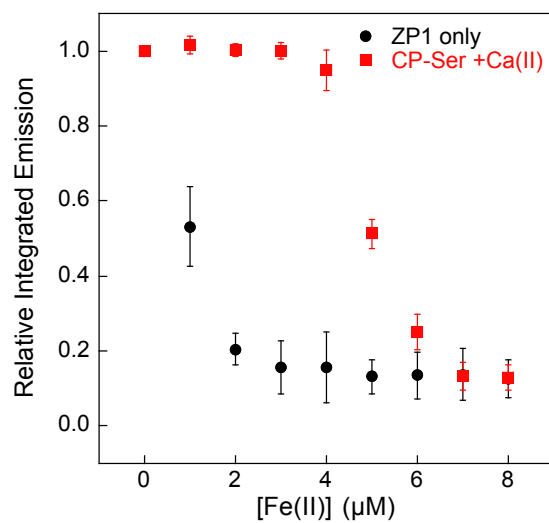

**Supplementary Figure 18.** Emission of ZP1 (1  $\mu\text{M}$ ) in the presence of 4  $\mu\text{M}$  CP-Ser and 200  $\mu\text{M}$  Ca(II) with 3 mM BME in the buffer (75 mM HEPES, 100 mM NaCl, pH 7.0) after >12 h of incubation. The integrated emission values were normalized to that of the Fe(II)-free sample (mean  $\pm$  SDM,  $n = 3$ ).

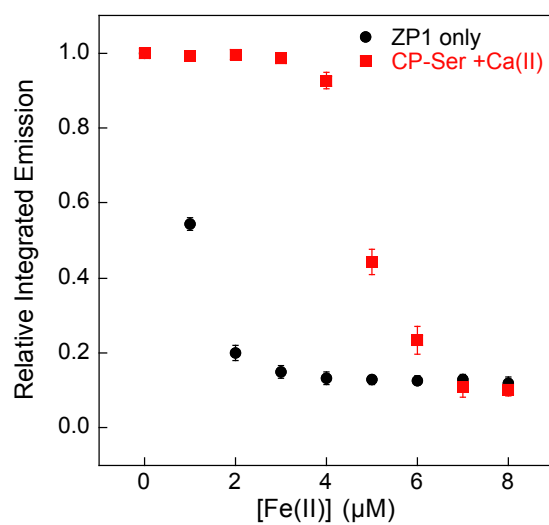

**Supplementary Figure 19.** Emission of ZP1 (1  $\mu\text{M}$ ) in the presence of 4  $\mu\text{M}$  CP-Ser and 200  $\mu\text{M}$  Ca(II) using  $\text{FeCl}_2$  as the Fe(II) salt (75 mM HEPES, 100 mM NaCl, pH 7.0) after >12 h of incubation. The integrated emission values were normalized to that of the Fe(II)-free sample (mean  $\pm$  SDM,  $n = 3$ ).

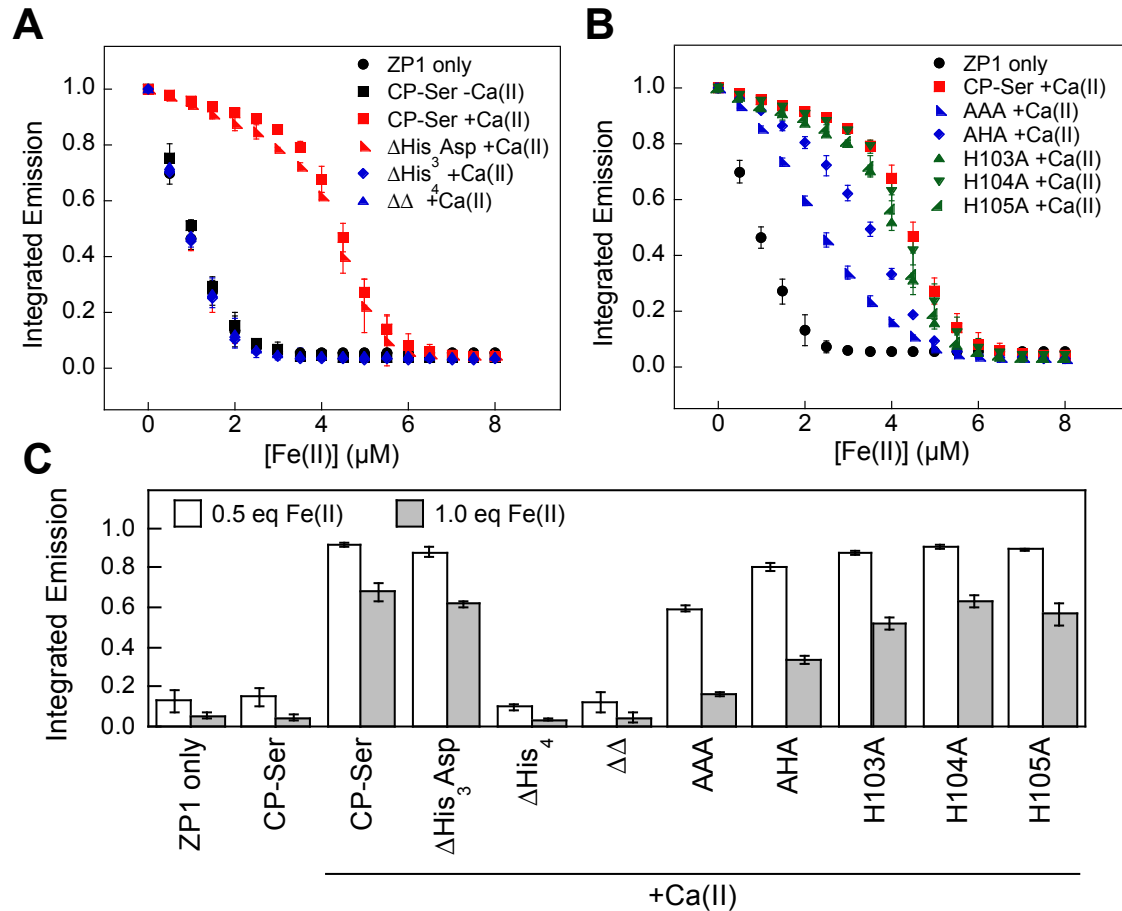

**Supplementary Figure 20.** ZP1 Fe(II) competition titrations with CP-Ser (75 mM HEPES, 100 mM NaCl, pH 7.0). **(A, B)** The titration with CP-Ser without Ca(II) exhibits similar behavior to the ZP1 only control, signifying that ZP1 outcompetes CP-Ser for Fe(II) under these conditions. CP-Ser and CP-Ser  $\Delta\text{His}_3\text{Asp}$  with 50 equiv of Ca(II) compete with ZP1 for Fe(II). CP-Ser  $\Delta\text{His}_4$  and CP-Ser  $\Delta\Delta$  with 50 equiv of Ca(II) exhibit outcompetition by ZP1 for Fe(II). Enhanced competition is observed for AAA, AHA, H103A, H104A, and H105A in the presence of 50 equiv of Ca(II). ZP1 emission was recorded after  $\sim 30$  min of incubation following each addition of Fe(II). **(C)** Relative integrated emission values of ZP1 and protein after addition of 0.5 (white bars) and 1.0 equiv of Fe(II) (gray bars). The integrated emission values were normalized to that of the Fe(II)-free sample (mean  $\pm$  SDM,  $n = 3$ ).

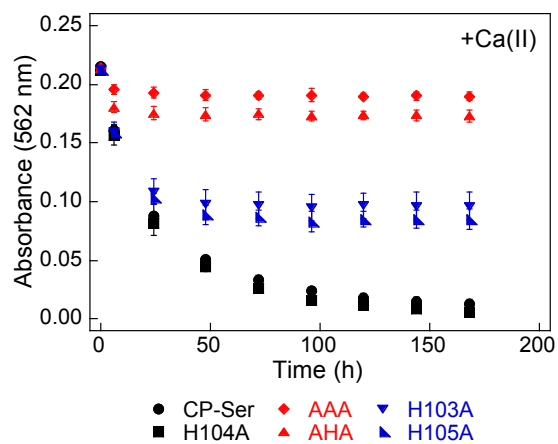

**Supplementary Figure 21.** Competition for Fe(II) between ferrozine and CP-Ser or tail variant monitored by absorbance at 562 nm over time in the presence of 50 equiv Ca(II) relative to protein in 75 mM HEPES, 100 mM NaCl, pH 7.0 (mean  $\pm$  SDM,  $n = 3$ ).

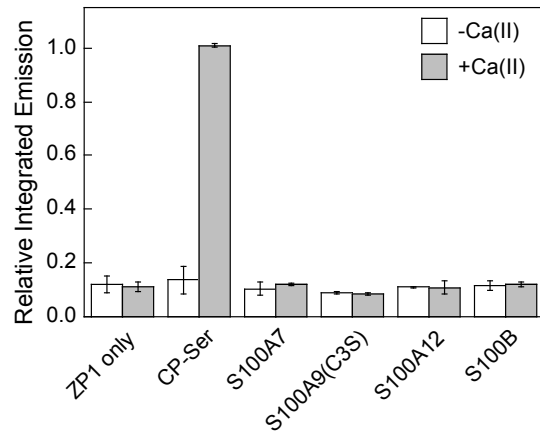

**Supplementary Figure 22.** ZP1 (1  $\mu$ M) emission response to Fe(II) in the presence of human S100 proteins (4  $\mu$ M) in the absence (white bars) and presence (gray bars) of 50 equiv Ca(II) relative to protein after >12 h of incubation (mean  $\pm$  SDM,  $n = 3$ ).

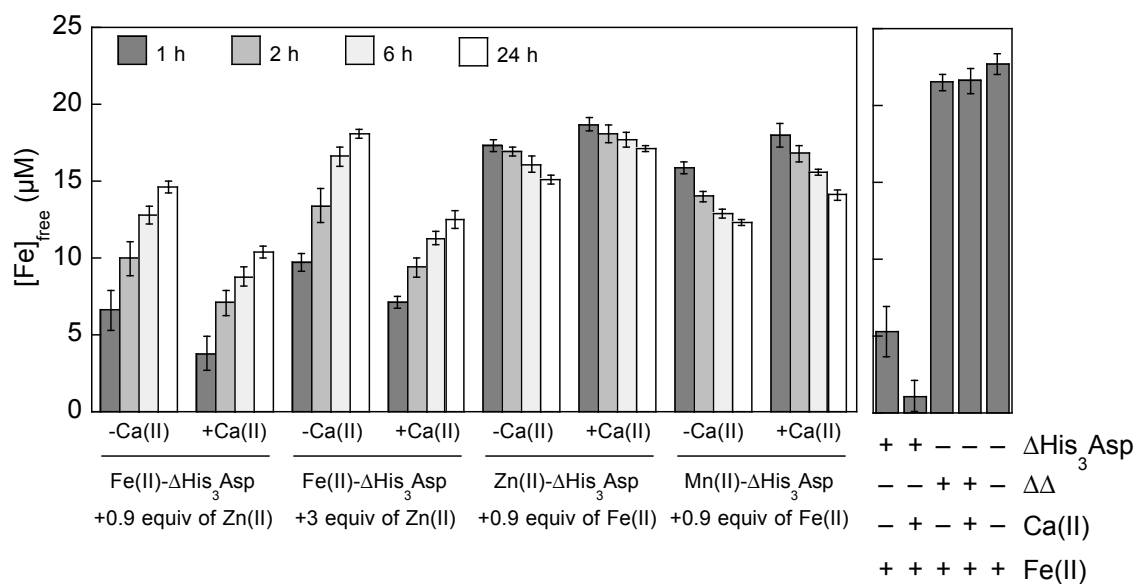

**Supplementary Figure 23.** The concentration of unbound Fe(II) in CP-Ser  $\Delta$ His<sub>3</sub>Asp samples containing Fe(II) and either Zn(II) or Mn(II) in the absence and presence of 50 equiv of Ca(II) in 75 mM HEPES, 100 mM NaCl, pH 7.0 (mean  $\pm$  SDM,  $n = 3$ ). The metals and the order of addition are described below each plot. The first and third set of samples are described in the main text and are provided here for comparison. Control samples without Zn(II) or Mn(II) are described in the right panel, also provided in the main text.

## Supplementary Note

**Determination of Fe(II) dissociation constant ( $K_{d,Fe(II)}$ ) of Zinpyr-1 (ZP1).** All buffers (75 mM HEPES, 100 mM NaCl, pH 7.0) were deoxygenated using a stream of N<sub>2</sub> or Ar for at least 1 h and stored in an anaerobic glove box. The experiments were conducted under strictly anaerobic conditions. Fe(II) buffering solutions (1 mL) were prepared with 1 mM ethylenediaminetetraacetic acid (EDTA), nitrilotriacetic acid (NTA), tris(2-pyridylmethyl)amine (TPA), or citrate in 75 mM HEPES, 100 mM NaCl, pH 7.0. The ligand was added from 100-mM stock solutions. EDTA, NTA, and citrate were prepared with Milli-Q water and a minimal amount of NaOH for dissolving the compound, and TPA was prepared in DMSO. Fe(II) was added to the buffering solutions from a 100-mM stock solution or a solution serially diluted therefrom. The free Fe(II) concentrations ranged from 10<sup>-16</sup> to 10<sup>-7</sup> M. Details of the buffering conditions are described in the Supplementary Information.

To these buffering solutions, 1 μM ZP1 was added from a 2-mM DMSO stock solution, and the samples were allowed to incubate in microcentrifuge tubes for 8 h in the dark. These solutions were transferred to screw-top quartz cuvettes in the anaerobic glove box. The cuvettes were sealed and removed from the glove box, and the emission of each sample was measured. The cuvettes were washed with nitric acid and Milli-Q water prior to each use to prevent metal-ion contamination. For each trial, the emission of a solution containing 1 μM ZP1 without Fe(II) was measured and integrated, and the integrated emission of all other solutions were normalized to this value. Excitation was provided at 490 nm, and the emission was scanned and integrated from 500 to 650 nm (10 nm/sec). The excitation and emission slit widths were set to 1.6 nm.

The relative integrated emission of each solution was plotted against the free Fe(II) concentration, and the data were fit to the following equation using the curve fit program in KaleidaGraph (Synergy Software):



$$F = 1 - R * \frac{R_{\min} * [\text{Fe(II)}]_{\text{free}}}{K_{d1,\text{Fe(II)}} + [\text{Fe(II)}]_{\text{free}}} - (1 - R) * \frac{R_{\min} * [\text{Fe(II)}]_{\text{free}}}{K_{d2,\text{Fe(II)}} + [\text{Fe(II)}]_{\text{free}}}$$

Where  $F$  is the relative integrated emission,

$R$  is the relative turn-off response of the first binding site,

$R_{\min}$  is the relative turn-off response at minimum fluorescence,

$[\text{Fe(II)}]_{\text{free}}$  is the free Fe(II) concentration,

$K_{d1,\text{Fe(II)}}$  is the Fe(II) dissociation constant at the first binding site, and

$K_{d2,\text{Fe(II)}}$  is the Fe(II) dissociation constant at the second binding site.

A two-site binding model was employed because ZP1 binds 2 equiv Fe(II).

**ZP1 Fe(II) Competition Experiments.** The following procedures were modified from protocols designed for ZP1 competitions with Mn(II).<sup>5,6</sup> Precautions to prevent oxygen and metal-ion contamination were taken as described above. Samples containing ZP1 were incubated wrapped in aluminum foil and handled in the dark. The excitation wavelength, emission integration, and fluorometer slit widths are given above.

To evaluate the Ca(II) dependence of Fe(II) competition between ZP1 and CP-Ser, Ca(II) was titrated from a 10 mM Ca(II) stock solution into a solution of 1  $\mu\text{M}$  ZP1, 4  $\mu\text{M}$  CP-Ser, and 3.5  $\mu\text{M}$  Fe(II) up to 200  $\mu\text{M}$  Ca(II). After each addition of Ca(II), the mixture was allowed to equilibrate 4–12 h before measuring the emission. At the end of the titration, 4  $\mu\text{M}$  Fe(II) was added to ensure the turn-off response of the sensor. The integrated emission was normalized to that of the ZP1 and CP-Ser solution prior to addition of Fe(II).

For the competition titrations with CP-Ser and mutants, solutions of 1  $\mu\text{M}$  ZP1 and 4  $\mu\text{M}$  CP in the absence or presence of 200  $\mu\text{M}$  Ca(II) were prepared. Fe(II) was titrated into each sample, allowing ~30 min incubation between each point. The metal-ion competition between ZP1 and CP requires >4 h incubation to reach equilibrium. However, the relative binding affinities of CP mutants were apparent after a shorter incubation period, and therefore, this ~30

min incubation time was employed for these competition titrations. The integrated emission of each sample was normalized to that of the Fe(II)-free sample. Titrations of a “ZP1 only” negative control and a “CP-Ser +Ca(II)” positive control were conducted in parallel for every trial. Each titration was conducted three times, and the mean  $\pm$  SDM are reported ( $n = 3$ ).

For the competition assays with other human S100 proteins, a solution of 1  $\mu$ M ZP1 and 4  $\mu$ M protein was incubated with 2  $\mu$ M Fe(II) in the absence and presence of 200  $\mu$ M Ca(II). The emission spectra were recorded at 12 h after Fe(II) addition and normalized to that of the Fe(II)-free samples.

For all other ZP1 competition assays, solutions of 1  $\mu$ M ZP1 and 4  $\mu$ M protein were incubated with 0, 1, 2, 3, 4, 5, 6, 7, or 8  $\mu$ M Fe(II) in the presence of 200  $\mu$ M Ca(II). The emission spectra were recorded >12 h after Fe(II) addition and normalized to that of the Fe(II)-free samples. The mean  $\pm$  SDM are reported ( $n = 3$ ).

**Ferrozine Fe(II) Competition.** Solutions (2 mL) of 300  $\mu$ M ferrozine, 8  $\mu$ M Fe(II), and 500 mM Ca(II) were prepared in 75 mM HEPES, 100 mM NaCl, pH 7.0, and the samples containing the [Fe(II)ferrozine<sub>3</sub>]<sup>2+</sup> complex were allowed to equilibrate for 30 min. The optical absorption spectrum of each sample was collected ( $t = 0$  h). Buffer-exchanged CP was added to each solution to a final concentration of 10  $\mu$ M. The optical absorption spectrum of each mixture was recorded at  $t = 6$  h and 24-h intervals over the course of 7 days. To evaluate the competition between ferrozine and CP, the absorbance at  $\lambda = 562$  nm was plotted against time. Three independent trials are reported (mean  $\pm$  SDM,  $n = 3$ ). To confirm that ferrozine was still able to bind Fe(II) in the presence of protein at the end of 7 days, 10  $\mu$ M Fe(II) was added to each sample, and an increase in the absorbance at 562 nm to the original value was observed.

## Supplementary References

1. Furia, T. E. Sequestrants in Food. *CRC Handbook of Food Additives* (1972).
2. Motekaitis, R. J. & Martell, A. E. The iron(III) and iron(II) complexes of nitrilotriacetic acid. *J. Coord. Chem.* **31**, 67–78 (1994).
3. Anderegg, G., Hubmann, E., Podder, N. G. & Wenk, F. Pyridine derivatives as complexing agents XI. Thermodynamics of metal complex formation with bis-, tris- and tetrakis[(2-pyridyl)methyl]-amines. *Helv. Chim. Acta* **60**, 123–140 (1977).
4. Königsberger, L. C., Königsberger, E., May, P. M. & Hefter, G. T. Complexation of iron(III) and iron(II) by citrate. Implications for iron speciation in blood plasma. *J. Inorg. Biochem.* **78**, 175–84 (2000).
5. Hayden, J. A., Brophy, M. B., Cunden, L. S. & Nolan, E. M. High-affinity manganese coordination by human calprotectin is calcium-dependent and requires the histidine-rich site formed at the dimer interface. *J. Am. Chem. Soc.* **135**, 775–787 (2013).
6. Brophy, M. B., Nakashige, T. G., Gaillard, A. & Nolan, E. M. Contributions of the S100A9 C-terminal tail to high-affinity Mn(II) chelation by the host-defense protein human calprotectin. *J. Am. Chem. Soc.* **135**, 17804–17817 (2013).
